# Supplementary material for: Highly Hydrophilic Ti−Beta Zeolite with Ti−Rich Exterior as Efficient Catalyst for Cyclohexene Epoxidation
Source: MDPI journal article supplement (doi:10.3390/catal12040434), 2022-04-12
Supplement: s1 [file s1]

# Highly Hydrophilic Ti–Beta Zeolite with Ti–Rich Exterior as Efficient Catalyst for Cyclohexene Epoxidation

Huang Pan <sup>1</sup>, Rusi Peng <sup>1</sup>, Zhiguo Zhu <sup>2</sup>, Hao Xu <sup>1,3,\*</sup>, Mingyuan He <sup>1,3</sup> and Peng Wu <sup>1,3,\*</sup>

<sup>1</sup> Shanghai Key Laboratory of Green Chemistry and Chemical Processes, School of Chemistry and Molecular Engineering, East China Normal University, North Zhongshan Road 3663, Shanghai 200062, China; panhuang1212@163.com (H.P.); rosyruth@163.com (R.P.); myhe@chem.ecnu.edu.cn (M.H.)

<sup>2</sup> Green Chemistry Centre, Department College of Chemistry and Chemical Engineering, Yantai University, 30 Qingquan Road, Yantai 264005, China; zhuzg@ytu.edu.cn

<sup>3</sup> Institute of Eco-Chongming, Shanghai 202162, China

\* Correspondence: hxu@chem.ecnu.edu.cn (H.X.); authors: pwu@chem.ecnu.edu.cn (P.W.)

**Abstract:** Nanocrystalline Ti–Beta zeolite with high hydrophilicity and a Ti-rich exterior was successfully prepared via a dissolution–recrystallization method. With the post-treatment of tetraethylammonium hydroxide (TEAOH) solution at elevated temperature, the Si and Ti species within the Ti–Beta matrix were partially dissolved and recrystallized on the outer surface of crystals, resulting in the Ti-rich exterior and higher hydrophilicity, which improved the accessibility of the active Ti sites and the enrichment of H<sub>2</sub>O<sub>2</sub>. Simultaneously, some of the closed Ti(OSi)<sub>4</sub> species were transformed to more active open Ti(OSi)<sub>3</sub>OH or Ti(OSi)<sub>2</sub>(H<sub>2</sub>O)<sub>2</sub>(OH)<sub>2</sub> species. The modified Ti–Beta zeolite exhibited greatly enhanced catalytic performance in the epoxidation of cyclohexene in comparison to the parent Ti–Beta.

**Citation:** Pan, H.; Peng, R.; Zhu, Z.; Xu, H.; He, M.; Wu, P. Highly Hydrophilic Ti–Beta Zeolite with Ti–Rich Exterior as Efficient Catalyst for Cyclohexene Epoxidation. *Catalysts* **2022**, *12*, 434. <https://doi.org/10.3390/catal12040434>

**Keywords:** Ti–Beta; Ti-rich exterior; hydrophilicity; cyclohexene epoxidation

Academic Editors: Anabela A. Valente and Tiehong Chen

Received: 12 March 2022

Accepted: 10 April 2022

Published: 12 April 2022

**Publisher’s Note:** MDPI stays neutral with regard to jurisdictional claims in published maps and institutional affiliations.

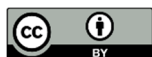

**Copyright:** © 2022 by the authors. Licensee MDPI, Basel, Switzerland. This article is an open access article distributed under the terms and conditions of the Creative Commons Attribution (CC BY) license (<http://creativecommons.org/licenses/by/4.0/>).

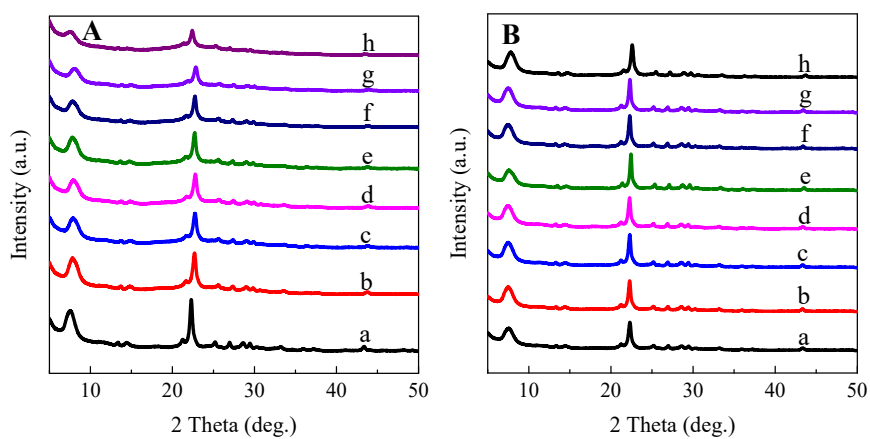

**Figure S1.** XRD patterns of Re-Ti-Beta-0.04 (A) and Re-Ti-Beta-0.20 (B) postsynthesized for a different crystallization time of 0 h (a), 1 h (b), 4 h (c), 8 h (d), 12 h (e), 16 h (f), 20 h (g), 24 h (h).

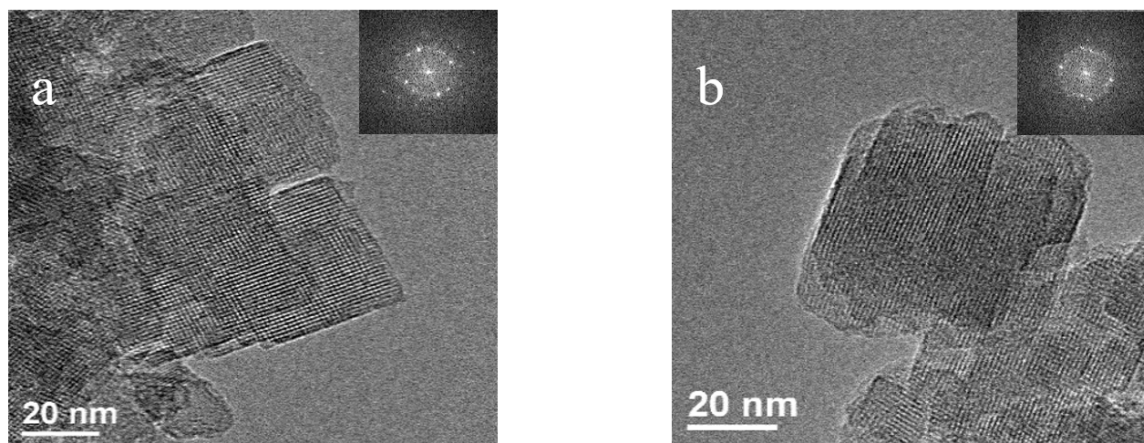

**Figure S2.** The TEM images of pristine Ti-Beta (a) and Re-Ti-Beta-0.20 (b).

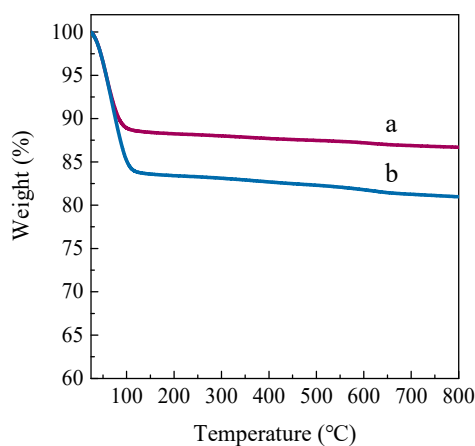

**Figure S3.** TG curves of Ti-Beta (a) and Re-Ti-Beta-0.20 (b) after adsorption of water vapor provided by saturated  $\text{NH}_4\text{Cl}$  solution at 293 K for 24 h.

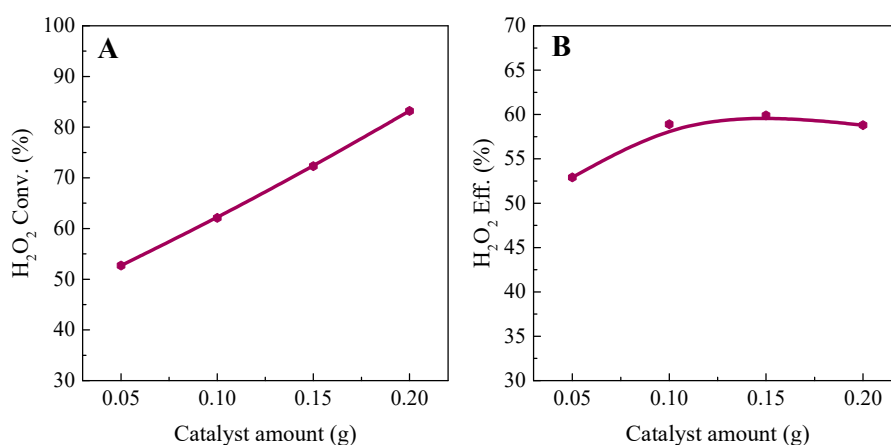

**Figure S4.** Dependence of  $\text{H}_2\text{O}_2$  conversion (A) and  $\text{H}_2\text{O}_2$  efficiency (B) on the amount of Re-Ti-Beta-0.20. Reaction conditions: CHE, 10 mmol;  $\text{H}_2\text{O}_2$  (30 wt.%), 10 mmol; MeCN, 10 mL; temp., 333 K; time, 2 h.

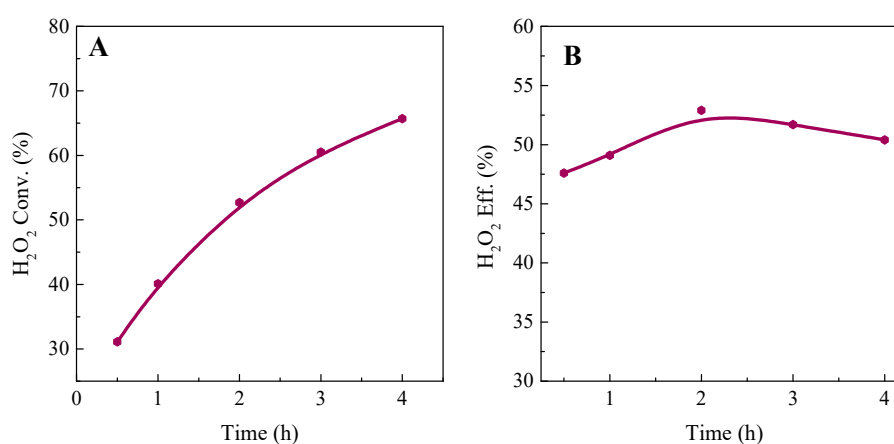

**Figure S5.** Dependence of  $\text{H}_2\text{O}_2$  conversion (A) and  $\text{H}_2\text{O}_2$  efficiency (B) on the reaction time over Re-Ti-Beta-0.20. Reaction conditions: catalyst, 50 mg; CHE, 10 mmol;  $\text{H}_2\text{O}_2$  (30 wt.%), 10 mmol; MeCN, 10 mL; temp., 333 K.

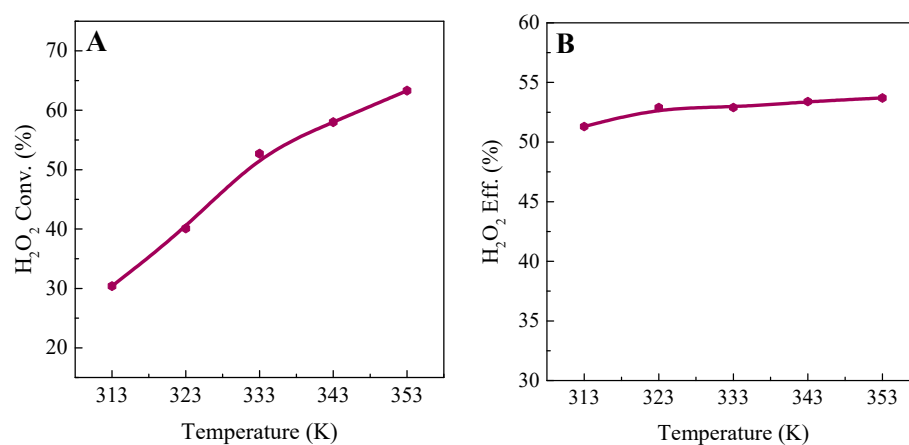

**Figure S6.** Dependence of H<sub>2</sub>O<sub>2</sub> conversion (**A**) and H<sub>2</sub>O<sub>2</sub> efficiency (**B**) at different reaction temperatures over Re-Ti-Beta-0.20. Reaction conditions: catalyst, 50 mg; CHE, 10 mmol; H<sub>2</sub>O<sub>2</sub> (30 wt.%), 10 mmol; MeCN, 10 mL; time, 2 h.

**Table S1.** The average values of reaction rate constants (k) at different reaction temperatures of Ti-Beta and Re-Ti-Beta-0.20 in cyclohexene epoxidation.

| Sample          | Reaction rate constant (k) 10 <sup>-5</sup> (s <sup>-1</sup> ) |       |       |       | apparent activation energies (Ea) (kJ mol <sup>-1</sup> ) |
|-----------------|----------------------------------------------------------------|-------|-------|-------|-----------------------------------------------------------|
|                 | 313 K                                                          | 323 K | 333 K | 343 K |                                                           |
| Ti-Beta         | 2.17                                                           | 3.75  | 5.57  | 7.80  | 35.35                                                     |
| Re-Ti-Beta-0.20 | 5.80                                                           | 10.66 | 14.20 | 18.83 | 31.72                                                     |
